# Supplementary material for: Incorporation of silica particles into decellularized tissue biomaterial and its effect on macrophage activation
Source: Royal Society of Chemistry journal article supplement (doi:10.1039/c4ra08984g), 2014-01-01
Supplement: c4ra08984g1.pdf [file c4ra08984g1.pdf]

*Electronic supplementary information*

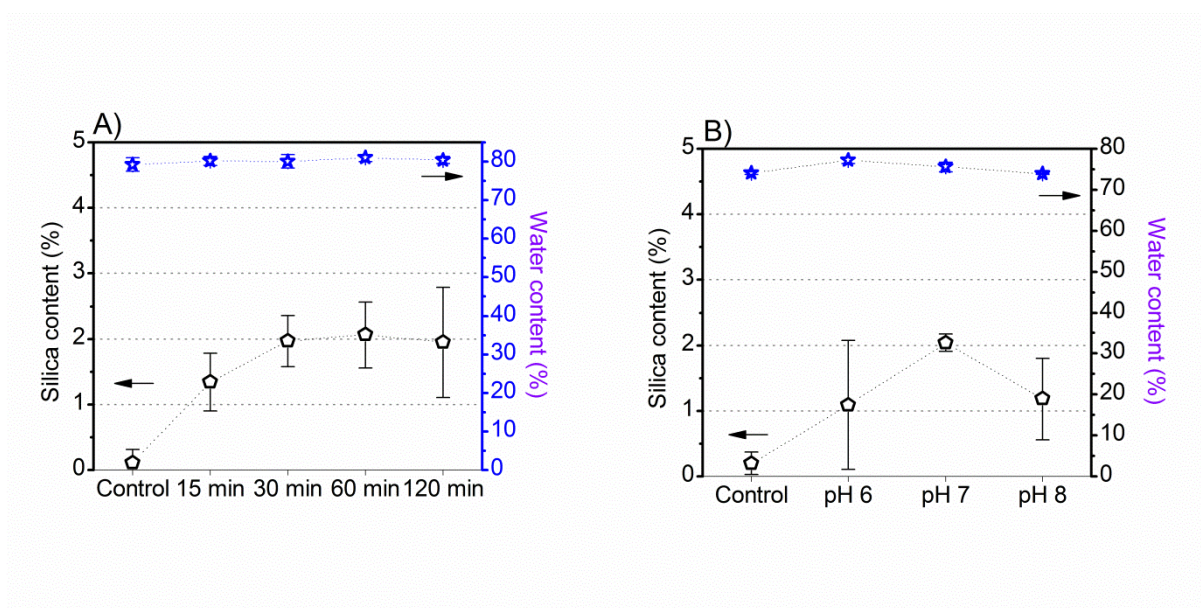

**Figure S1.** Effect of the elapsed time at pH 7 (A) and of pH after 30 min (B) of soaking of uncrosslinked-ECM scaffolds in the sodium silicate solution on the silica and water content of the biocomposite. Control: uncrosslinked ECM scaffolds soaked in sodium silicate solution for a few seconds. n=4-6.

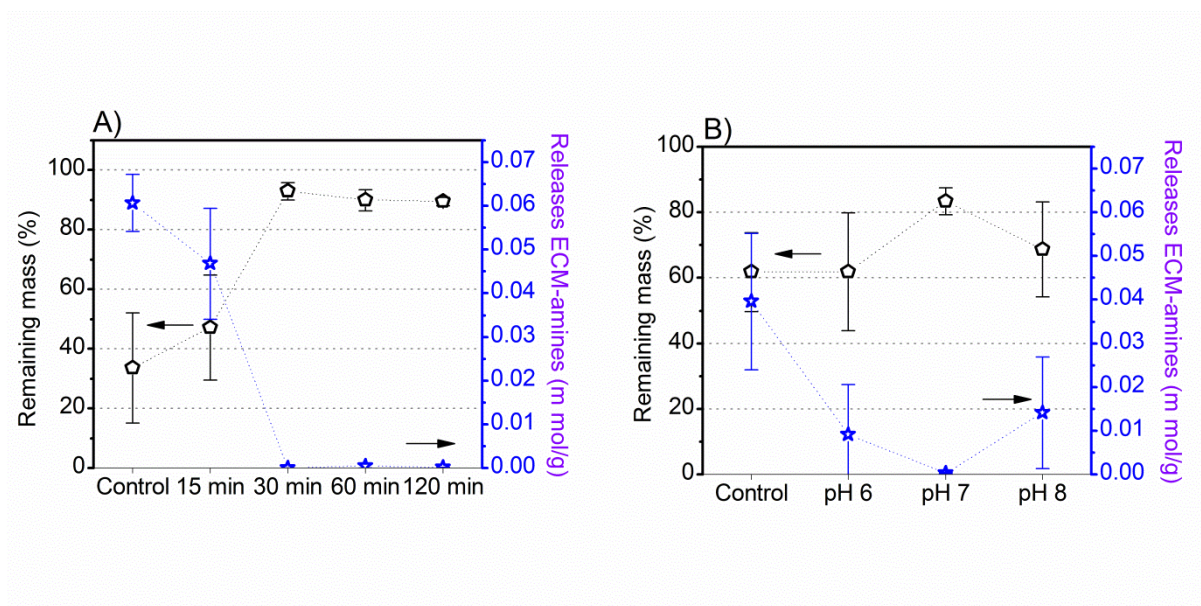

**Figure S2.** Effect of the elapsed time at pH 7 (A) and of pH after 30 min (B) of soaking of uncrosslinked-ECM scaffolds in the sodium silicate solution on the collagenase degradation resistance of the biocomposite. Control: uncrosslinked ECM scaffolds soaked in sodium silicate solution for a few seconds. n=4.

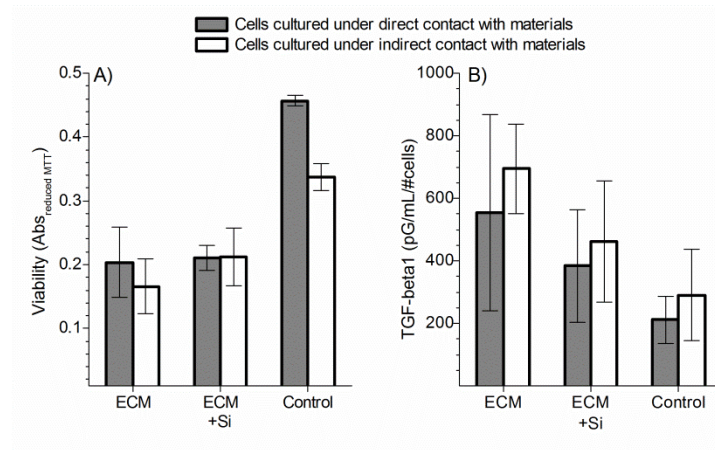

**Figure S3.** Viability (A) and secretion of TGF- $\beta$ 1 (B) by RAW264.7 macrophages cultured directly on materials for 24 h (gray), or cultured on wells for 16 h before the addition of the materials (+24 h of culture, white). The active form of TGF- $\beta$ 1 was generated by heat treatment (80°C, 5 min) and quantified by an ELISA kit (ebioscience). n=3-6.

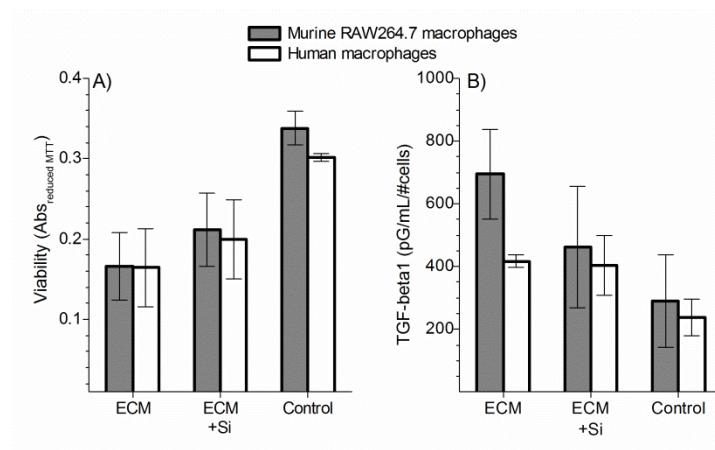

**Figure S4.** Viability (A) and secretion of TGF- $\beta$ 1 (B) by murine RAW264.7 macrophages (gray) or human macrophages cultured for 16 h on wells before the addition of the materials (+24 h of culture, white). The active form of TGF- $\beta$ 1 was generated by heat treatment (80°C, 5 min) and quantified by an ELISA kit (ebioscience). n=3-6.
